# Supplementary material
Source: bioRxiv or medRxiv preprint supplement (https://www.biorxiv.org/highwire/filestream/115948/field_highwire_adjunct_files/1/381434-2.pdf)

Slezak, Kandler et al.: Supplementary Figure 1

**a**

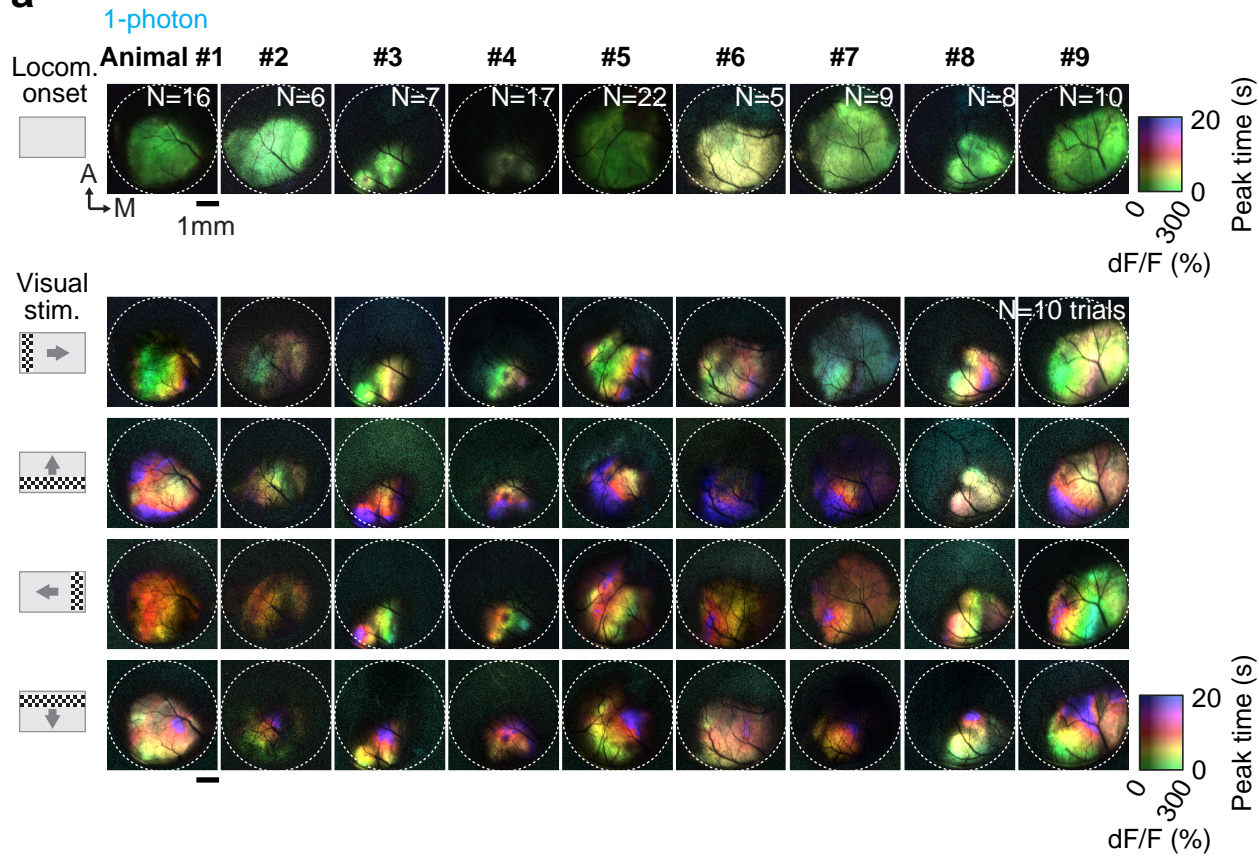

**b**

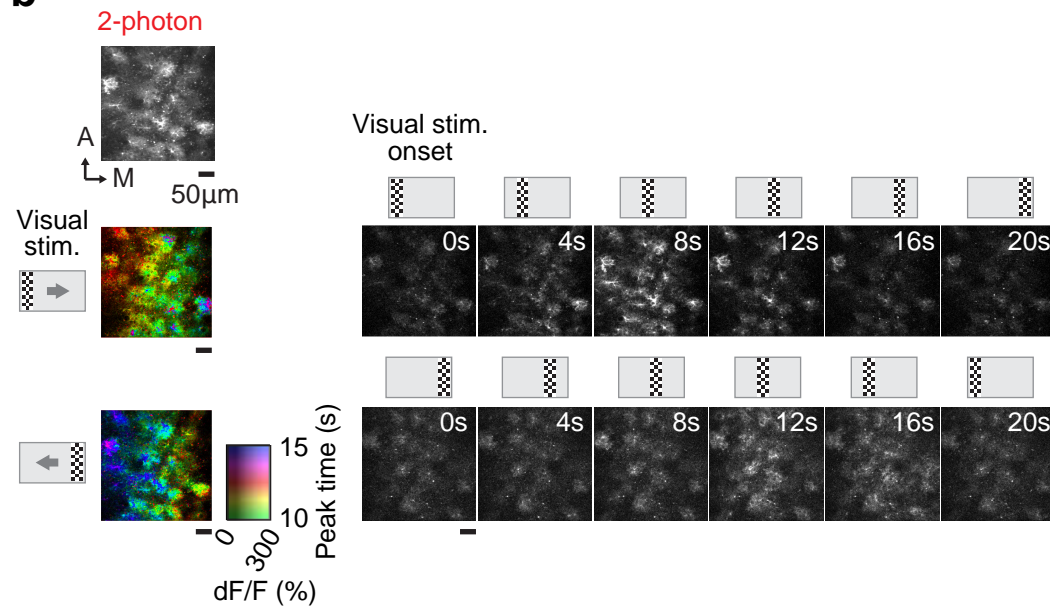

**c**

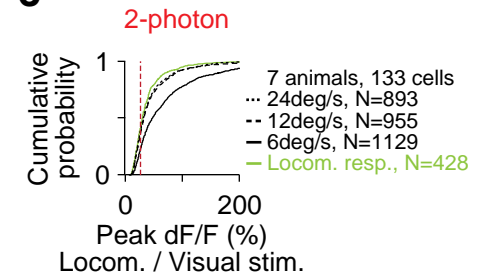

**d**

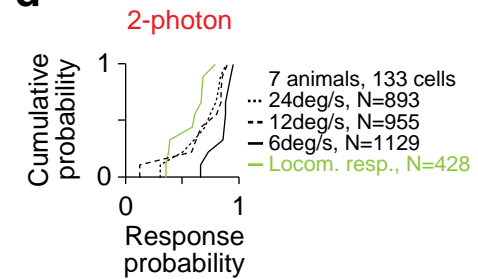

**e**

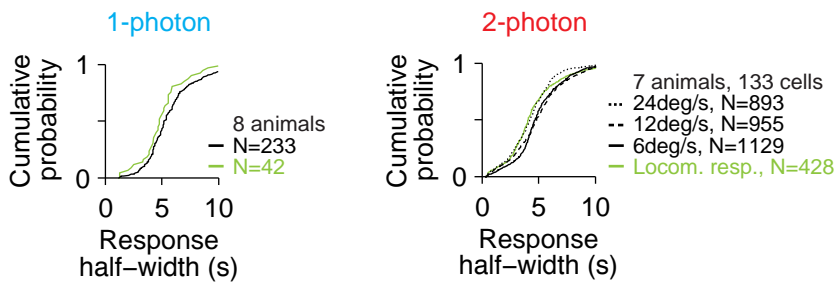

Supplement: Supplementary file [file 381434-2.pdf]
